# Supplementary material for: Electrophysiological characterisation of iPSC-derived human β-like cells and an SLC30A8 disease model
Source: PubMed Central journal article supplement — bioRxiv. 2023 Oct 18:2023.10.17.561014. Preprint. [Version 1] doi: 10.1101/2023.10.17.561014 (PMC10614917; doi:10.1101/2023.10.17.561014), 2023-10-18
Supplement: media-1.pdf [file media-1.pdf]

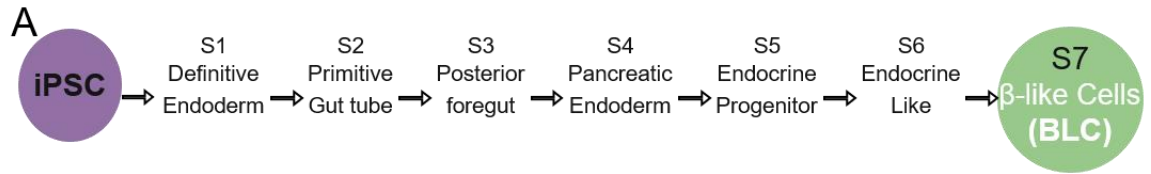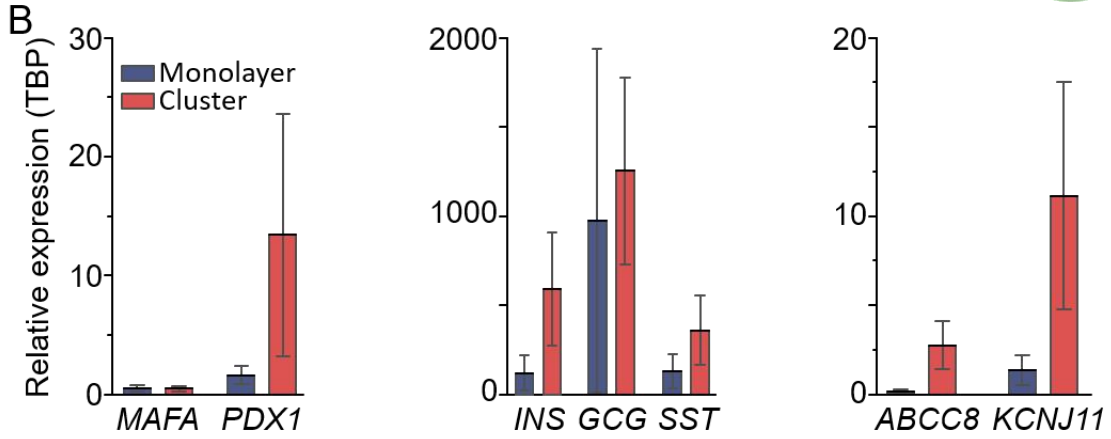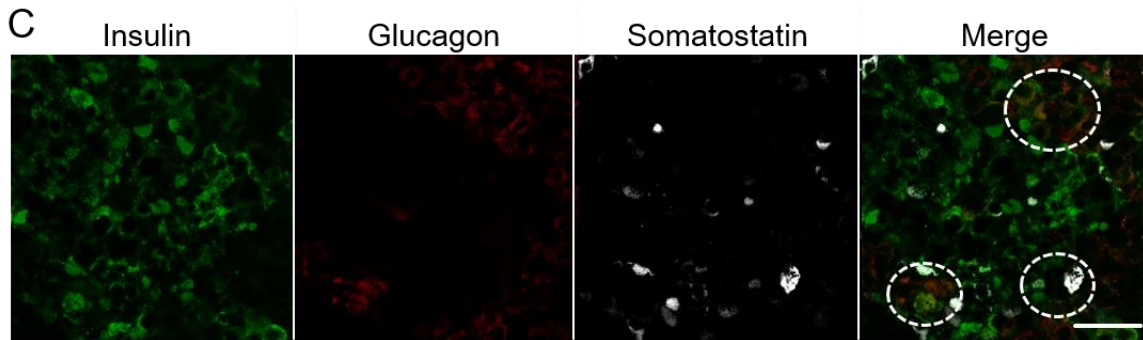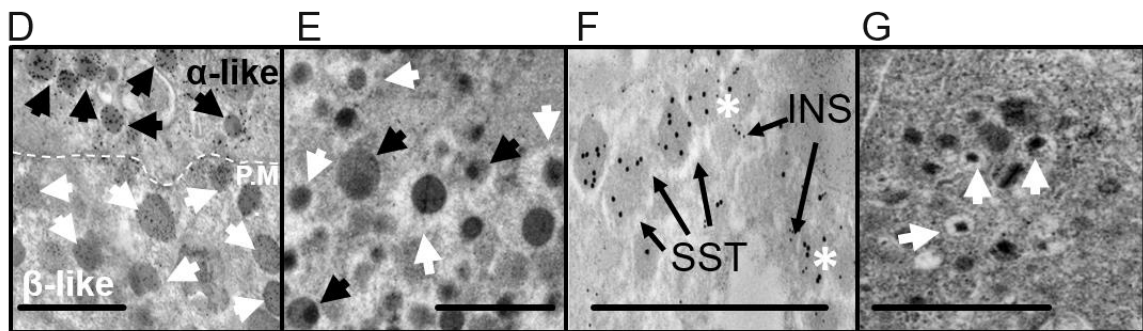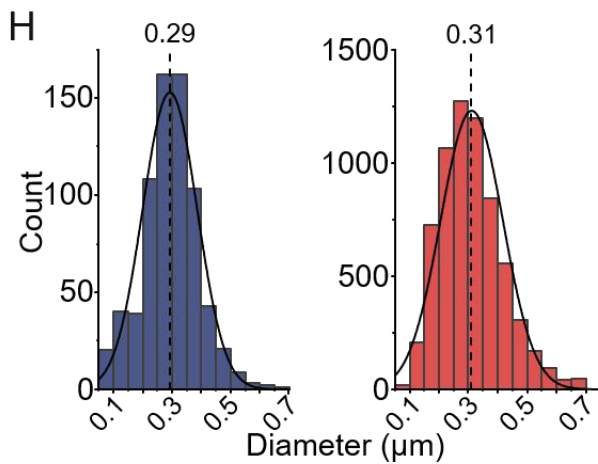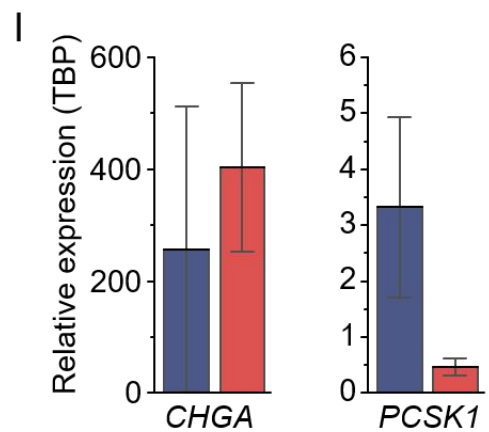

**Supplementary Figure 1**

**Supplementary Figure 1: Overview of the characterisation of iPSC derived BLCs. A.**

iPSC were derived following the 25-day differentiation protocol. **B.** RT-qPCR data shows variability in the expressions of differentiation markers (left,  $n_{cl}=8$ ,  $n_{mono}=4$ ), pancreatic hormones (centre,  $n_{cl}=8$ ,  $n_{mono}=4-5$ ), and  $K_{ATP}$  channels subunits (right,  $n_{cl}=9$ ,  $n_{mono}=4$ ). **C.** Clusters ( $n=5$ ) and monolayer ( $n=1$ ) preparations were stained for pancreatic hormones: Insulin (green), Glucagon (red), and somatostatin (white). Polyhormonal cells are circled (dash circled) on the merge panel. Scale bar  $50\mu m$ . **D-G**, ultrastructure of BLCs. **D.** Immunogold labelling of cells expressing either insulin (10nm gold particles, white arrowhead, BLC) or either glucagon (15nm gold particles, black arrowheads,  $\alpha$ -like cell). PM, Plasma Membrane (dash line). **E.** Electron micrograph of a polyhormonal cell presenting heterogeneous vesicular structures, some typical of glucagon containing vesicles (black arrow heads) or of insulin containing vesicles (white arrowheads). **F.** Immunogold labelling of a polyhormonal cell positive for insulin (10nm gold particles) and somatostatin (SST, 15nm). The hormones could be detected in independent and within the same vesicles (white stars). **G.** Representative electron micrographs of cells containing structurally matured insulin vesicles (white arrows). Scale bar  $1\mu m$ . **H.** Vesicle size distribution in clusters and monolayers ( $n_{mono}=713$  and  $n_{cl}=6532$  vesicles). **I.** BLCs express components of the trafficking pathway *CHGA* (left), component of insulin maturation *PCSK1*(right) ( $n_{cl}=6$ ,  $n_{mono}=3$ ).
