# Supplementary material for: Electrophysiological characterisation of iPSC-derived human β-like cells and an SLC30A8 disease model
Source: PubMed Central journal article supplement — bioRxiv. 2023 Oct 18:2023.10.17.561014. Preprint. [Version 1] doi: 10.1101/2023.10.17.561014 (PMC10614917; doi:10.1101/2023.10.17.561014), 2023-10-18
Supplement: media-3.pdf [file media-3.pdf]

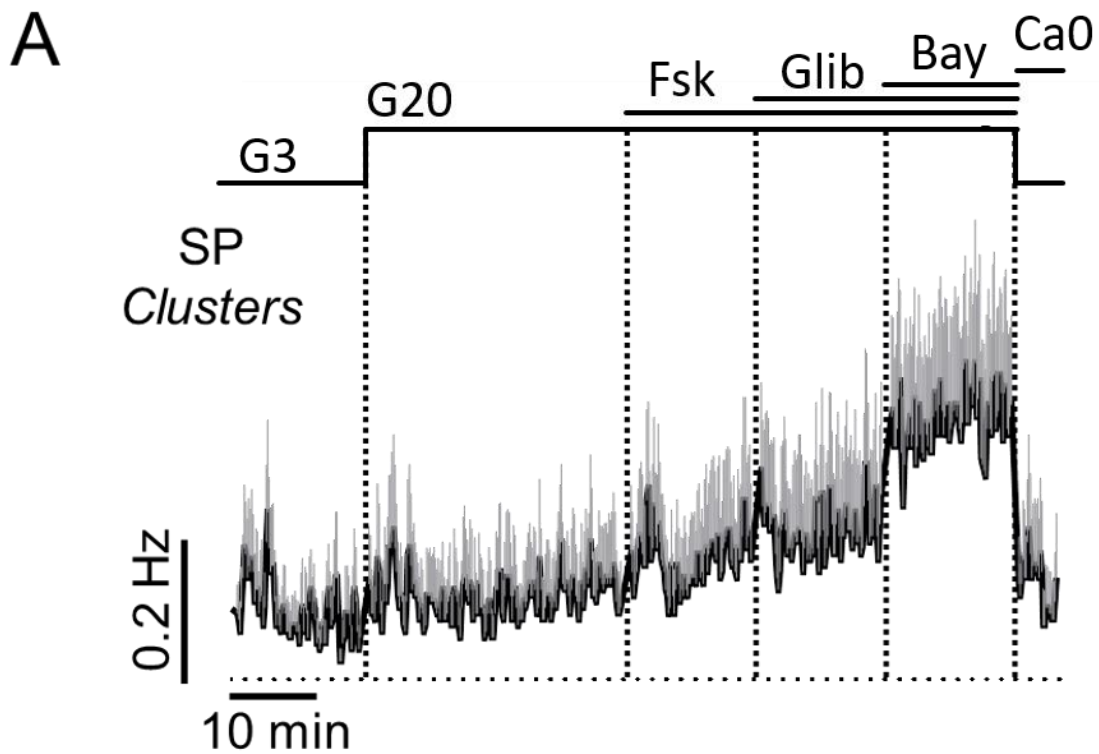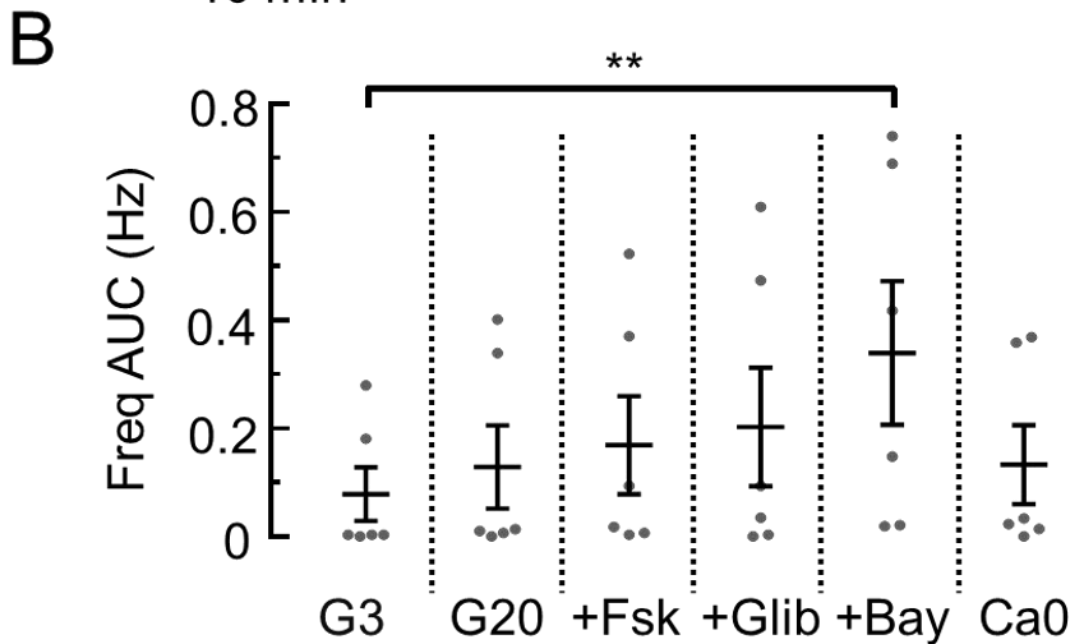

### Supplementary Figure 3

**Supplementary Figure 3: Functional quality control with MEAs of a cluster preparation of BLCs.** (A) Kinetics of SP frequencies (means +SEM) of BLCs in clusters in response to several stimuli: 3 mM glucose (G3), 20 mM glucose (G20) alone, followed by successive additions of forskolin (Fsk, 1  $\mu$ M), glibenclamide (Glib, 100 nM) and Bay K8644 (Bay, 10  $\mu$ M). At the end of the protocol, G3 without calcium (Ca0) was applied to inhibit calcium entry (n=10). (B) Statistics on AUCs of SP frequencies (normalized over time) measured in (A) (n=10, \*\*p<0.01; Friedman test).
