# Supplementary material for: Electrophysiological characterisation of iPSC-derived human β-like cells and an SLC30A8 disease model
Source: PubMed Central journal article supplement — bioRxiv. 2023 Oct 18:2023.10.17.561014. Preprint. [Version 1] doi: 10.1101/2023.10.17.561014 (PMC10614917; doi:10.1101/2023.10.17.561014), 2023-10-18
Supplement: media-4.pdf [file media-4.pdf]

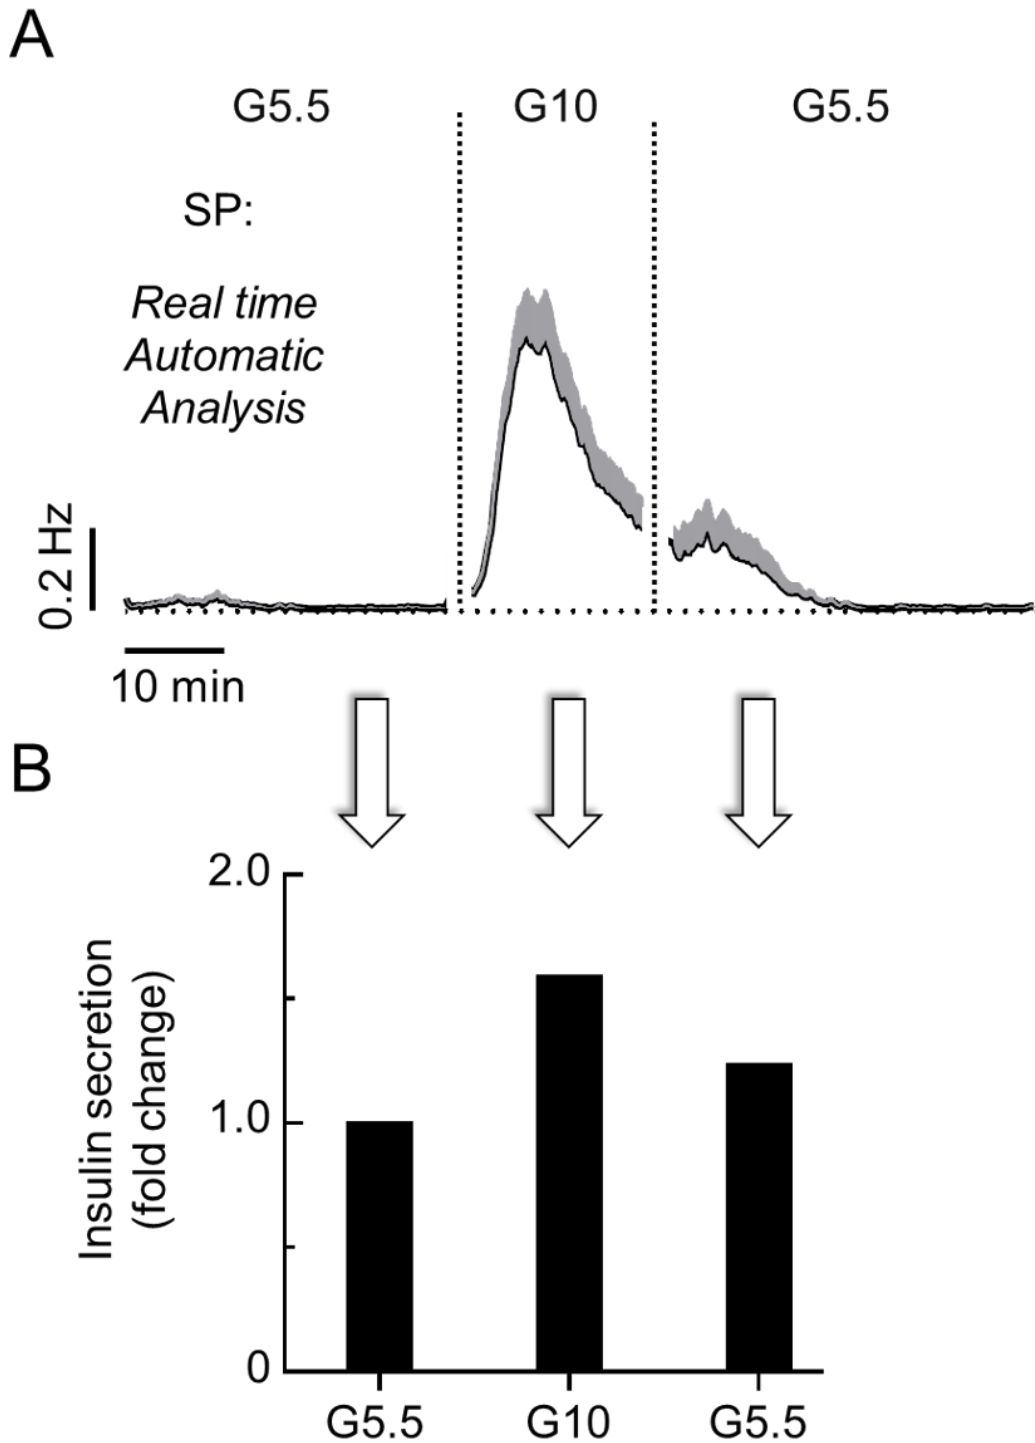

### Supplementary Figure 4

**Supplementary Figure 4: Combination of automatic microelectronic analysis of SPs and insulin secretion.** (A) Real time automatic hardware determination of SP frequencies (means +SEM, n= 29) in BLCs in monolayer when glucose increases from 5.5 to 10 mM and then returns to 5.5 mM. (B) Corresponding insulin secretions (relative to the first G5.5).
